# Supplementary material
Source: Springer Nature journal article supplement (https://www.springermedizin.de/resource/supplementary/12936_2010_1588_MOESM3_ESM.pdf/9542236)

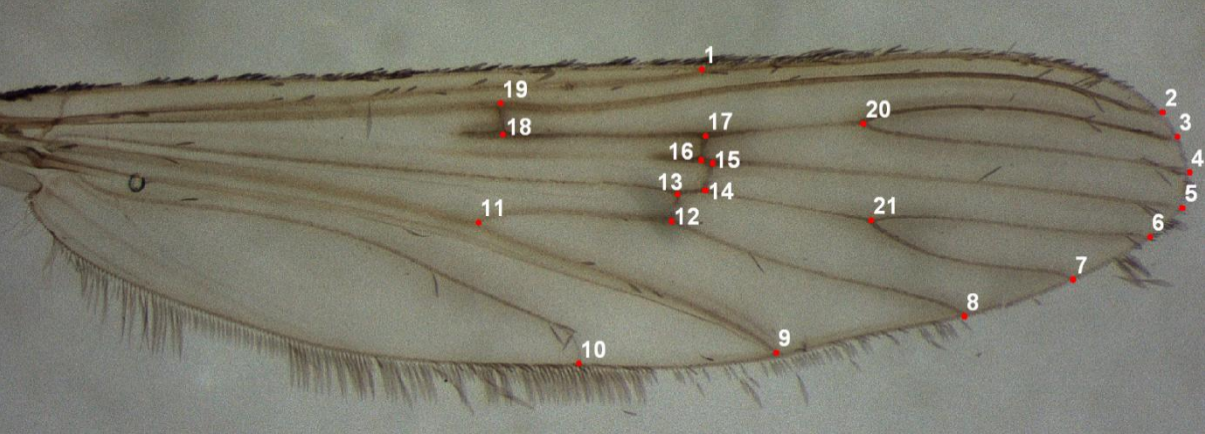

1

19

18

17

20

2

3

16

15

4

13

14

5

11

12

21

6

7

10

9

8

Supplement: MOESM3 [file 9542236]
